# Supplementary material for: Highly expressed STAT1 contributes to the suppression of stemness properties in human paclitaxel-resistant ovarian cancer cells
Source: PubMed Central journal article supplement (PMC7346083; doi:10.18632/aging.103317), 2020-06-09
Supplement: aging-12-103317-s001..pdf [file aging-12-103317-s001..pdf]

## SUPPLEMENTARY TABLE

**Supplementary Table 1. Primer and siRNA sequences used in experiments.**

| Target primer and siRNA                  | Sequence 5' → 3'        | Position in sequence |
|------------------------------------------|-------------------------|----------------------|
| <b>qRT-PCR primers</b>                   |                         |                      |
| STAT1                                    |                         |                      |
| Forward                                  | TCCGTTTTTCATGACCTCCTG   | nt 10179-10198       |
| Reverse                                  | TGAATATTCCTCCGACTGAGC   | nt 18088-18107       |
| GAPDH                                    |                         |                      |
| Forward                                  | GCACCGTCAAGGCTGAGAAC    | nt 249 to 268        |
| Reverse                                  | TGGTGAAGACGCCAGTGGA     | nt 368 to 386        |
| <b>siRNA</b>                             |                         |                      |
| STAT1-siRNA                              |                         |                      |
| Sense                                    | GCGUAAUCUUCAGGAUAAUtt   | nt 649 to 667        |
| Antisense                                | AUUAUCCUGAAGAUUACGctt   |                      |
| Control-siRNA                            |                         |                      |
| Sense                                    | UUCUCCGAACGUGUCACGUtt   | Scramble             |
| Antisense                                | ACGUGACACGUUCGGAGAAtt   |                      |
| <b>MSP and Sanger sequencing primers</b> |                         |                      |
| Fragment A                               |                         |                      |
| Forward                                  | GAGGTAGGAAAAAGTAAGAAGG  | nt 4542-4563         |
| Reverse                                  | CTAAATAAACTACAACCCAATCC | nt 4874-4896         |
| Fragment B                               |                         |                      |
| Forward                                  | GGATTGGGTTGTAGTTTATTTAG | nt 4874-4896         |
| Reverse                                  | CAACCAAACCCCTCCACAAACTC | nt 5098-5120         |
| Fragment C                               |                         |                      |
| Forward                                  | GAGTTTGTGGAGGGGTTTGGTTG | nt 5098-5120         |
| Reverse                                  | CTCAAACACATTCTTCCTC     | nt 5356-5375         |

The sequence position of STAT1 and GAPDH primers is indicated based on the sequences in the GenBank with accession # NG\_008294.1 and # NM\_002046, respectively. MSP, methylation-specific polymerase chain reaction; nt, nucleotide.
